# 1 **Compositional Variability and Mutation Spectra of Monophyletic**

## 2 **SARS-CoV-2 Clades**

3

4 Xufei Teng<sup>1,2,3,#</sup>, Qianpeng Li<sup>1,2,3,#</sup>, Zhao Li<sup>1,2,3,#</sup>, Yuansheng Zhang<sup>1,2,3,#</sup>, Guangyi Niu<sup>1,2,3</sup>,  
5 Jingfa Xiao<sup>1,2,3</sup>, Jun Yu<sup>1,2,3,\*</sup>, Zhang Zhang<sup>1,2,3,\*</sup>, Shuhui Song<sup>1,2,3,\*</sup>

6

7 <sup>1</sup> *China National Center for Bioinformation, Beijing 100101, China*

8 <sup>2</sup> *National Genomics Data Center & CAS Key Laboratory of Genome Sciences and*  
9 *Information, Beijing Institute of Genomics, Chinese Academy of Sciences, Beijing 100101,*  
10 *China*

11 <sup>3</sup> *University of Chinese Academy of Sciences, Beijing 100049, China*

12 # These authors contributed equally

13 \*Correspondence:

14 [songshh@big.ac.cn](mailto:songshh@big.ac.cn) (Song S), [zhangzhang@big.ac.cn](mailto:zhangzhang@big.ac.cn) (Zhang Z), [junyu@big.ac.cn](mailto:junyu@big.ac.cn) (Yu J).

15

### 16 **Abstract**

17 COVID-19 and its causative pathogen SARS-CoV-2 have rushed the world into a staggering  
18 pandemic in a few months and a global fight against both is still going on. Here, we describe  
19 an analysis procedure where genome composition and its variables are related, through the  
20 genetic code, to molecular mechanisms based on understanding of RNA replication and its  
21 feedback loop from mutation to viral proteome sequence fraternity including effective sites on  
22 replicase-transcriptase complex. Our analysis starts with primary sequence information and  
23 identity-based phylogeny based on 22,051 SARS-CoV-2 genome sequences and evaluation of  
24 sequence variation patterns as mutation spectrum and its 12 permutations among organized  
25 clades tailored to two key mechanisms: strand-biased and function-associated mutations. Our  
26 findings include: (1) The most dominant mutation is C-to-U permutation whose abundant  
27 second-codon-position counts alter amino acid composition toward higher molecular weight  
28 and lower hydrophobicity albeit assumed most slightly deleterious. (2) The second abundance  
29 group includes: three negative-strand mutations U-to-C, A-to-G, G-to-A and a positive-strand  
30 mutation G-to-U generated through an identical mechanism as C-to-U. (3) A clade-associated  
31 and biased mutation trend is found attributable to elevated level of the negative-sense strand

32 synthesis. (4) Within-clade permutation variation is very informative for associating non-  
33 synonymous mutations and viral proteome changes. These findings demand a bioinformatics  
34 platform where emerging mutations are mapped on to mostly subtle but fast-adjusting viral  
35 proteomes and transcriptomes to provide biological and clinical information after logical  
36 convergence for effective pharmaceutical and diagnostic applications. Such thoughts and  
37 actions are in desperate need, especially in the middle of the *War against COVID-19*.

38

39 KEYWORDS: SARS-CoV-2; Nucleotide composition; Mutation spectrum; Viral replication

40

## 41 **Introduction**

42 COVID-19, a novel pneumonia epidemic causing an outbreak first identified and reported in  
43 Dec 2019 from China [1] and subsequently spread to other countries swiftly, has been posing  
44 enormous professional, economic, and political challenges to global health services and  
45 hazardous control systems. As of 12 June 2020, there have been 7,410,510 confirmed cases  
46 and 418,294 deaths reported [2]. COVID-19 is of great contagious (even at incubation period)  
47 and has lower mortality to our current understanding [3-5]. The novel betacoronavirus  
48 identified through *de novo* sequencing from patients with COVID-19 is designated as “Severe  
49 Acute Respiratory Syndrome Coronavirus 2 (SARS-CoV-2)” by International Committee on  
50 Taxonomy of Viruses (ICTV) [1, 6, 7].

51 The recent threats from SARS-CoV-2, SARS-CoV, and MERS-CoV are different from  
52 those of earlier human coronaviruses (CoVs), including alphacoronaviruses, such as hsa-CoV-  
53 229E, hsa-CoV-NL63, hsa-CoV-OC43 and hsa-CoV-HKU1 [8-10], in at least two aspects.  
54 First, the recent groups of betacoronaviruses appears to come more frequently in the past two  
55 decades as compared to the early comers where new members may be discovered as technology  
56 become more efficient and accurate [11]. The current SARS-CoV-2 is also different from both  
57 SARS-CoV and MERS-CoV as its genome composition is most closely for “living with  
58 mammals and humans”, where a much lower G+C content has been evolved and is closer to  
59 two other human-adapted CoVs, hsa-CoV-229E and hsa-CoV-OC43, than its members of the  
60 recent group, although it shares higher sequence identities with the two new CoVs, 80.12%  
61 and 60.06%, respectively [11]. Second, it has been infecting far larger populations, as  
62 compared to the two recent outbreaks, with variable yet more complex symptoms [12]. The  
63 causative factors of such an unprecedented disease potency remain to be elucidated for the days  
64 and months to come [1, 3–7].

65 Genomes of coronaviruses mutate in a unique way where signatures of DNA pairing and  
66 repairing mechanisms are absent completely, and instead, they possess an error-prone synthesis  
67 of single-stranded full or partial genomic sequences by multi-component membrane-associated  
68 enzymatic structure known as the replicase-transcriptase complexes (RTCs) and double-  
69 membrane vesicles (DMVs) although they do have certain enzymatic activity resembling repair  
70 mechanisms of cellular organisms, such as proofreading [13], and other possible cellular  
71 mechanisms may also be involved, such as RNA editing as recently proposed [14,15]. Here we  
72 define a series of displays to understand compositional dynamics or variability that ultimately  
73 interconnects to proteomic variability including RTCs and DMVs (of course also other omics)  
74 through the organization of the genetic code [16–19]. We subsequently compare SARS-CoV-  
75 2 with other human CoVs for between-population variation analysis to point out that it is not a  
76 direct descendant of the previous human-infecting CoVs. We finally make efforts to decipher  
77 the SARS-CoV-2 clades for its variations and suggest that what we have seen now are not the  
78 natural picture of the pandemics and the missing-links are not among human populations but  
79 the wildlife close to human habitats in Southeast Asian territories, including islands and  
80 shorelines, not just limited to bats and pangolins. We also show how to examine clade-  
81 associated permutation variations and relate genetic variations to protein structures and  
82 phenotypic data. Nailing down a single animal of human origin of the virus will not be the  
83 goals of this genomics-based study but to provide information for smarter drug design,  
84 effective vaccine development, accurate diagnostics.

85

## 86 **Results and Discussion**

87

### 88 **Compositional dynamics and its parameters are essential and useful features for** 89 **evaluating the evolutionary status and molecular mechanisms of SARS-CoV-2 towards** 90 **pandemics**

91

92 RNA genomics is very different from DNA genomics in several ways [11]. First, in the RNA  
93 genome, the A:U basepair is actually 2 Daltons heavier than that of the G:C basepair due to a  
94 larger molecular weight of uridine, whereas in the DNA genome the GC pair is a single Dalton  
95 heavier than that of the A:T basepair. In CoVs, the G+C content is actually in a trend of  
96 reducing so that the virus is in turn becoming heavier due to the increased U content [11].  
97 Second, single-stranded RNA genomes are synthesized without stable double-stranded

98 intermediates that allow mismatch repair albeit existence of short and extremely rare double-  
99 stranded RNA fragments involved in interference-based immunity [20, 21]. Third, the  
100 existence of Wobble basepairing for secondary structures is of essence for operational  
101 functions of all RNA molecules in addition to genetic information inheritance [22]. That said,  
102 we can now look at how the RNA genome of SARS-CoV-2 and related CoVs take advantage  
103 of these RNA-centric features.

104 As a positive-sense single-stranded RNA virus, SARS-CoV-2 has a genome length of ~  
105 29903 nucleotides (nt) (GenBank: NC\_045512.2). It encodes two large polypeptides, ORF1a  
106 and ORF1b, along with other 15 non-structure proteins (nsps; **Figure 1A**). In order to propagate  
107 and complete the life cycle, its positive-sense genome is first replicated to synthesize full-  
108 length negative-sense antigenomes and 10 shorter subgenomes (sgRNAs), executed by RTCs  
109 and DMVs, and the sgRNAs encode four structural proteins (S, spike; E, envelope; M,  
110 membrane; and N, nucleocapsid) and six accessory proteins (ORF3a, ORF6, ORF7a, ORF7b,  
111 ORF8, and ORF10) arranged among structural proteins depending on the current annotation  
112 (GenBank: NC\_045512.2).

113 Traditionally, we use three basic plots to display composition dynamics based on primary  
114 genomic parameters over genome length: G+C contents at three codon positions (GC1, GC2  
115 and GC3); purine content (A+G content); and GC skew (the content of (G-C)/(G+C)). Here,  
116 we use a 300-nt sliding window with a step size of 21 nt, as the majority of viral sequences are  
117 protein-coding, to illustrate the dynamics of the composition parameters, G+C and purine  
118 contents (Figure 1B). The G+C content of SARS-CoV-2 varies in a narrow but significant  
119 window of 18.00% (31.67%–49.67%) and the purine content in a slightly narrower window of  
120 15.50% (41.67%–57.17%) in average over the entire genome length. The GC skew of the  
121 SARS-CoV-2 genome indicates the G+C ratio is relatively higher in structural proteins than  
122 ORF1ab and this imbalance is a signature of distinct mutational biases caused by viral  
123 replication machinery, known as RTCs. It is also variable as a frequent shift toward negative  
124 values are often seen in individual ORFs and defined proteins. Such minor anomalies suggest  
125 either recombination or selection events, which are species- or isolate-specific. The differences  
126 become obvious when SARS-CoV-2 is compared to the closely-related bat and pangolin CoVs  
127 (raf-betaCoV-RaTG13 and mja-betaCoV-P4L; Figure S1A and S1B), and the authentic within-  
128 species variation is exemplified when SARS-CoV and MERS-CoV are matched up with civets  
129 and camels in similar parameters, respectively (Figure S1C, S1D, S1E and S1F). The G+C  
130 content of different codon positions is also very informative, where GC3 is very characteristic  
131 of mutation pressure as it is obvious that all GC3 values of the viral proteins are biased toward

132 lower G+C contents. GC3-associated mutations often reflect directional mutation patterns as  
133 observed strongly in certain lineages of plants and warm-blooded vertebrates as negative  
134 gradients from the transcription starts, and such trends are attributable to a special DNA repair  
135 mechanism, transcription-coupled DNA repair [23–25]. The notion here is to remind ourselves  
136 that transcription-centric mutations may be accounted for some of the mutation events in RNA  
137 viruses in their replication-transcription processes. Occasional twists from the trend often  
138 indicate selective pressures, such as in the case of S, M, and N proteins, and weaker GC3 or  
139 stronger GC1 or GC2 selections. Codon-associated G+C content trends are less informative for  
140 small ORFs, such as the case of ORF10. Most of the sequence signatures are indicative rather  
141 than proven functional relevance of proteins but very useful for providing clues of sequence  
142 anomaly.

143 For studying RNA viral genomes, in addition to previously-defined parameters, we need to  
144 introduce the concept of single nucleotide (A, U, G and C) contents at three codon positions  
145 (such as U1, U2 and U3 for uridines) (**Figure 2**) and to plot out compositional dynamics for  
146 positive-sense or the genome and negative-sense strands, which include both templates for  
147 synthesizing new positive-sense genomes or antigenome and subgenomes. All viral mRNAs  
148 are transcribed from an antigenome and other 9 subgenomes (Figure 2B). For compositional  
149 dynamics of RNA genomes, uridine is the star nucleotide, and A+U content becomes the most  
150 important. Just for the sake of convenience, we would like to keep the concept of G+C content  
151 since it has been known to be a useful variable for DNA compositional dynamics [26] and  
152 provide an approximation for less selected nucleotide position. For both DNA and RNA viruses,  
153 this variable G+C content remains similar to their hosts mostly, except those that are not well  
154 adapted to their hosts, such as SARS-CoV or MERS-CoV (Figure S2A; [11]).

155 As shown in a phylogenetic tree constructed based on 15 representative coronaviruses  
156 (Figure 2A), the nucleotide content of SARS-CoV-2 is most similar to those of raf-betaCoV-  
157 RaTG13 and mja-betaCoV-P4L, which are considered to be distantly related but most closely  
158 related so-far-found host of SARS-CoV-2. Other known zoonotic and corresponding human  
159 counterpart CoVs are rather close to each other in their compositions. We have made a few  
160 interesting observations here. First, the single nucleotide content is more informative than G+C  
161 content, especially for genome analysis on RNA viruses. The former points out only how G+C  
162 content drifts toward richness or poorness but the latter narrows it down to single nucleotide  
163 effect. In our case, U stands out at cp3, which alters the overall nucleotide contents, and it  
164 drives the G+C content so low that even its partner A content has gone to the same extremity,  
165 so that the low G+C content is a result of both lowering U and A. If the organization principles

166 are considered here, half of the codons are not sensitive to cp3 changes, and most of them are  
167 smaller amino acids (Figure S2B; [16–19]). Second, at the cp1, G and C contents are both  
168 pulled apart toward extremity but not A or U, while the two pyrimidines and two purines appear  
169 stretched to separate directions; these trends suggest strong selective pressure at the first codon  
170 position over the entire genome. It is indeed that cp1 codons shoulder the most mutation  
171 pressures since they fall into all 4 negative-sense strand permutations (known as R1-derived  
172 permutations, C-to-U, G-to-A, U-to-C and A-to-G). Third, the cp2 contents are most row-  
173 flipping changes referenced to the genetic code organization [18]. These alterations are very  
174 useful for alternating chemical characteristics between related amino acids, and in terms of  
175 flexibility, cp2 codons are less stringent than cp3 but more flexible than cp1. The balancing  
176 power becomes more obvious when ORFs or proteins are examined individually for their  
177 composition dynamics (Figure 1C). Finally, it is conclusive that the more similar the CoVs in  
178 composition dynamic parameters, the closer they are genetically and phylogenetically in  
179 principle. However, primary parameters, such as G+C and purine contents are necessary but  
180 may not be sufficient. For instance, there has been a CoV genome isolate from a wild vole  
181 captured in northeastern China, whose G+C and purine contents overlap with SARS-CoV-2  
182 completely (Rodent coronavirus isolate RtMruf-CoV-2/JL2014; 0.38, 0.496; [27]) but its  
183 genome sequence is different (sharing 61.87% identity with SARS-CoV-2). Therefore, we have  
184 yet to find a within-population immediate animal host of SARS-CoV-2 albeit best similarity  
185 of composition dynamics seen among them.

186 Our subsequent study is focused on composition dynamics within CoV genomes. It is  
187 interesting to see uniformity among all codon position contents of all CoV genomes, increased  
188 G+C content from antigenomes to subgenomes. However, this trend is an illusion where the  
189 real trend is the lower G+C content of antigenomes but higher G+C contents of subgenomes  
190 due to stronger selection over structural proteins. This observation becomes clearer when all  
191 ORFs and proteins are scrutinized one by one (Figure 1C and Figures S1). SARS-CoV-2 has  
192 an exceptionally short subgenome 9 (sg9) which only contains ORF10, but we have no  
193 evidence that it is either functional or non-functional. These results collectively remind us that  
194 SARS-CoV-2 and its two most-closely-related CoVs, unlike in the case of many other known  
195 CoVs, have a unique genome composition and similar dynamics to the early-adapted human  
196 CoVs [11], and CoV-borne bats and other mammals may already coexist with ability to jump  
197 on to humans and domestic animals but only limited by environmental and geographic  
198 constraints.

199

200 **Mutation spectrum is composed of permutations that are distinct according to their**  
201 **strand specificity, order of synthesis, and ratio of positive-sense vs. negative-sense strands**  
202 **during propagation**

203 We use 12 permutations to represent directional mutations and classify them according to  
204 strand-specific replication mechanisms (**Figure 3**) since they are readily related to codons [11]  
205 (Figure S2B). From a total of 5,054 point mutations, 1,416, 1,497, and 2,141 mutations fall on  
206 codon position 1, 2, and 3, respectively. The permutations are categorized into R1 (C-to-U, G-  
207 to-A, U-to-C and A-to-G), R2 (C-to-A, U-to-G, A-to-C and G-to-U), and R12 (C-to-G, U-to-  
208 A, A-to-U and G-to-C) derived according to their occurrence tailored to RTC-directed strand  
209 synthesis: R1 from the first negative-sense strand, R2 from the subsequent positive-sense  
210 strand, and R12 from R1 plus R2. The most abundant permutations are four R1 permutations  
211 and one R2 permutation, G-to-U (Figure 3A and 3B). What have we shown here is how  
212 sensitive are nucleotide content of cp3 to selective pressure, and most cp3 permutations  
213 disappear except the R2 G-to-U permutations at cp3, where all changes are transversions and  
214 more than half of all codons (all pro-diversity changes) are sensitive to them. Similar results  
215 are observed in our analysis on SARS-CoV and MERS-CoV (Figure S3A and S3B). There are  
216 slightly different patterns among SARS-CoV and MERS-CoV and their within-population  
217 mammals from the SARS-CoVs and close relatives, the higher U-to-C permutations. The  
218 predominate C-to-U represents a driving force of variation, and it manifests why both G+C and  
219 A+G contents of SARS-CoV-2 appear relatively lower against MERS-CoV and SARS-CoV  
220 and even more when compared to human CoVs, such as 229E and OC43 (Figure S2A).

221 Since most cp1 and cp2 related permutations are sensitive to selection, we have examined  
222 how individual permutations correlated to codon rearrangements in the two halves tables: pro-  
223 diversity and pro-robustness (Figure 3C and 3D) [16, 17]. Only two examples, C-to-U and A-  
224 to-G, are shown here and the rest are summarized in Figure S3C. Several observations are  
225 worthy of in-depth discussion. First, it is known that three amino acids and their codons are  
226 unique in balancing one of two purine-sensitive halves; they are Leu (leucine), Arg (arginine),  
227 and Ser (serine) [16–19]. The most abundant amino acid in protein coding sequences (known  
228 as codon usage) is Leu and it buffers C-to-U|U-to-C mutations at cp1. Arg and Ser are also  
229 abundant as they both are 6-fold degenerate codons; Arg appears buffering A-to-G|G-to-A at  
230 cp1 and Ser carries two: U-to-A|A-to-U at cp1 and G-to-C|C-to-G at cp2. Second, amino acid  
231 exchanges are permissive in physiochemical properties [23–25]. For instance, Ser has a very  
232 similar size to Ala (alanine) so that G+C content increase is buffered by the two amino acids  
233 as G-to-U|U-to-G permutations. Third, other examples are codon alterations among

234 hydrophobic amino acids as they are mostly C-to-U changes at cp2 among those in the pro-  
235 robustness half. The overall effects are displayed together in Figure 3D. It is rather clear that  
236 changes toward lower G+C content and near the balanced purine content are both beneficial  
237 for CoVs, especially SARS-CoV-2, as these changes are pro-diversity, in favor of larger and  
238 more hydrophilic amino acids.

239

#### 240 **Clade-associated biased mutation trend in SARS-CoV-2 revealed physiochemical** 241 **features of replication machinery**

242 Difficulties for analyzing CoV genomes are multifold. Since we have yet to identify the natural  
243 hosts and mammalian intermediate hosts, if there is any, this massive dataset has to be analyzed  
244 by stratifying the data into structured and non-structured clades; the former can be analyzed  
245 first and the rest await further ideas. The next is even more troublesome. Assuming that we  
246 have 5 or more genome sequences per CoV isolate and variations identified among them are  
247 still a miniscule fraction of the total virions produced in a patient body (medians and means of  
248 variations per CoV isolate among C01 to C09, see Table S3), since the viral load per patient  
249 sample, such as sputum [28, 29], is equivalent to a 5-person or more sampling of the entire  
250 human population on earth, 1 out of  $10^9$ . Even so, we have still been able to find shared  
251 variations among patient samples occasionally and even more lucky to have some clade  
252 structures, by and large due to the relatedness of the patients in the transmission network.  
253 Finally, we have to admit that many assumptions have to be made about these samples and  
254 their genome sequences above sequence and assembly errors for phylogeny and genetic studies.

255 Nevertheless, we have constructed a somewhat stable phylogenetic tree-and-branch  
256 structure for further analysis (**Figure 4A**). It is composed of 8 monophyletic clades and 1 non-  
257 monophyletic clade based on both orders of sample collection date and highly-shared mutations.  
258 Among the clades, C02 shares two landmark mutations, C8782U in ORF1ab and U28144C in  
259 ORF8, and earlier date (2019/12/30). C04 shares three more mutations (C17747U, A17858G,  
260 and C18060U in ORF1ab) than what C02 have, and a late collection date (2020/02/20). Clades  
261 C03, C05, and C07 are also distinguishable by some major mutations, so are C06, C08, and  
262 C09; the latter clades are clustered together based on four shared and other clade-associated  
263 mutations. The leftover large number of isolates that lack all landmark mutations are grouped  
264 into C01, which have the earliest collection date on 2019/12/24. According to the literature and  
265 our discussion, we have further grouped the clades into three clusters, S (C02 and C04), G  
266 (C06, C08 and C09), and L (all the rest) since phylogeny shows clear divergence among them.  
267 We have several notions about this imperfect hierarchical structure. First, our within- and



268 between-clade analysis of high major allele frequency (MAF) variations reveals that some  
269 clade-associated signature mutations are also shared among clades. For instance, C14805U in  
270 ORF1ab and A24034G in Cluster S have recurred in other clades of different clusters, which  
271 are excellent landmarks for subclade definition. Another notion is that higher MAF within-  
272 clade mutations (such as  $MAF > 0.2$ ) are mostly non-synonymous mutations, indicating  
273 selection at work (Figure S4). Our neighbor-joining tree based on distances from 9 clades  
274 suggests that SARS-CoV-2 appears originated from multiple zoonotic reservoirs instead of a  
275 single direct ancestor (Figure S4). In addition, our classification rationales are largely in  
276 agreement with published reports [30]; for example, Cluster S is in accordance with previously  
277 defined S type [31] and Cluster G is in line with GISAID [32] defined the G clade. Cluster L  
278 is similar to the V and L clades combined, of GISAID. A maximum likelihood (ML) based  
279 unrooted phylogenetic tree is shown in Figure 4B.

280 To look for clade-associated compositional and functional features, we have first built a  
281 consensus sequence for each clade and subsequently calculated frequencies for each within-  
282 clade permutation (Table S2; **Figure 5A** and **5B**). A key assumption behind this is that certain  
283 functional mutations may have clade-specific effects on mutation spectrum, to close a loop  
284 where sequence mutations through genetic coding principles alter the viral proteome function.  
285 Our observations are of importance in establishing logics about compositional dynamics  
286 between nucleic acids and proteins. First, permutations among clades are indeed variable  
287 according to their proportions calculated from genome variants, and aside from 5 high-  
288 proportion permutations, 4 R1 and 1 R2 permutations, two other R2 and one R12 permutations  
289 appear also joining in, which are U-to-G and A-to-C, as well as A-to-U, respectively. Second,  
290 the variable permutations, where some may represent effect of mutation pressure and others  
291 may exaggerate selection pressure, are unique to clades and clade clusters. For instance, clade  
292 cluster S has the lowest G-to-U fraction as compared to those of L and G; in addition, among  
293 the S clades, C04 has the lowest value of G-to-U. Similarly, C03, C05, C06, C08, and C09  
294 have relatively higher G-to-U permutations. Third, based on the disparity of permutations or  
295 simply mutation spectra, we have taken a rather radical step to assume RTC statuses in favor  
296 of either *tight* or *loose* statuses for binding to purines and pyrimidines (see Figure S5). Since  
297 purines are larger than pyrimidines in size, the purine- or R-tight must be different from  
298 pyrimidine- or Y-tight. The results are strikingly predictable in that the R-tight status suggests  
299 a tighter binding pocket where a descending trend for tight permutations (C-to-U, G-to-U, and  
300 U-to-A) reverses into the opposite trend for Y-tight permutations. It indicates that the RTC  
301 structure and conformation variables may be definable in principle. At this point, we do not

302 have discrete definitions for these so-called tight statuses but the less trendy R-loose and Y-  
303 loose statuses also support a similar idea.

304 We have further examined the compositional subtleties among the clades and clusters with  
305 a focus on G+C and purine content variability as both contents appear drifting toward optima  
306 in SARS-CoV-2 and its relatives (Figure 5C and 5D). Different clades exhibit distinct  
307 compositional features and such dynamics are very indicative for the existence of feedback  
308 loops connecting RNA variables to protein variables. Two directions have to be advised for  
309 understanding these features albeit in absence of between-clade statistics. The first direction is  
310 driven by strong mutations, perhaps coupled to tight-loose switches in the catalytic pocket of  
311 RdRPs in RTCs. It is clear that except C01, the G or C06-C08-C09 cluster has the lowest G+C  
312 (0.37929, based on a C08 CoV sampled in Australia) and the lowest purine contents (0.49527,  
313 based on a C08 CoV collected in Bangladesh and a C09 CoV collected in England). Both lower  
314 G+C and purine contents are indicative of mutation pressure and signal this fast-evolving  
315 cluster of CoVs. Since this cluster has the largest collection of CoVs, it is also not surprising  
316 to see a more complex median diversification within clades (Figure 5C and 5D). The second  
317 direction is the drive from selection or both selection and mutation in balance or imbalance, as  
318 well as in modes of fine-tuning or quick-escaping. Some results from our analyses are shown  
319 here for briefing purposes (Figure 5E to 5G). For instance, G+C and purine contents at cp3 are  
320 informative for mutation drives and other measures are less clear cut (Figure 5F), given the  
321 evidence that even MAFs among clades are not stably distributed among clades as lower MAF  
322 variations are rather sporadic and hard to analyze even binned into groups (data not shown).

323 Based on our clade and clade cluster analysis, it is tempting for us to speculate that there  
324 are plenty of rooms for further investigations into mutation spectra among large clades and  
325 even smaller clades or closely related individual CoV genomes for several reasons. First, all  
326 high-frequency MAFs should be identified and classified and these variations are candidates  
327 for highly selected mutations. Second, all within-clade minor but not rare alleles (less than  
328 1/10,000), such as those of MAFs in a range of 0.01% to 10% should also be identified; they  
329 provide basis of within-clade sequence analysis. Third, all non-structured CoV genomes must  
330 be also classified based on shared variations, as they are not only valuable for within-clade but  
331 also for clade-cluster analyses since there is a large background of genome variations not yet  
332 brought into the databases.

333

334 **Within-clade variations and their implications for future SARS-CoV surveillance**

335 Within-clade compositional dynamics can also be very informative, especially for covering  
336 and predicting future functional changes, such as identifying mutated and diversified forms of  
337 CoVs for drug and vaccine designs. It is also of essence for nucleic acid-based diagnostics,  
338 such as clade-specific identifications. We are in a process of developing an interactive database  
339 and mutation-function predicting algorithms based on our results to interpret novel sequence  
340 variations in real time. Within-population variations are identified based on clade consensus  
341 sequence after alignment and extracted from datasets that have hundreds and thousands of  
342 genome sequences. The analysis of within-population variations relies on structured phylogeny  
343 and proportion change of permutations. The changes, based on functional relevance, can be  
344 classified into either copy number-related or RTC-specificity related, or sometimes both.

345 We have taken two steps to extract information in order to distinguish the underlining  
346 mechanisms (**Figure 6**). In the first approach, we identify key mutations based on MAF of  
347 mutations with a consideration of relatively even distribution among subclades and name the  
348 subclades in a sequential order based on the absence of a subset (Figure 6A). In the second step,  
349 we plot out permutations to track changes among subclades (Figure 6B). For instance, clade  
350 C02 can be divided into 8 subclades and its variable permutation fractions are clearly  
351 recognizable. An immediate discovery is the trends of descending C-to-U, ascending A-to-G,  
352 and wavy G-to-U that initially goes up with A-to-G but rides down with C-to-U afterward.

353 Taking the two smaller clades, such as C03 and C05, as examples (Figure 6D and 6E), we  
354 first find that their trends of permutation variables show opposite directions, where the  
355 increasing C-to-U accompanies with the decreasing G-to-U. A closer examination reveals that  
356 the increasing C-to-U in C03 is also accompanied by descending U-to-C. The only permutation  
357 showing an increasing trend in C03 is G-to-A. The take-home message from these trends is  
358 that RNA synthesis of this subclade is biased toward producing more negative-sense strands  
359 or its mutation spectrum exhibits increasing mutations generated during the negative-sense  
360 strand synthesis. Such analysis can be carried out continuously when more CoV genome data  
361 become available as other within-clade variations are not as informative as C03 vs. C05 (Figure  
362 S6).

363 Several precautions are worth noting in such analysis. The most noticeable weakness is the  
364 fact that we assume function-related mutations are discovered in our dataset. As we have  
365 proposed an analogy before, chances are slim, dozens out of millions or even billions.  
366 Furthermore, even if we see drastic changes in permutations and mutation spectra, the  
367 mutations we identified still need validation empirically and based on different data types or  
368 sources albeit rare and precious. Finally, most frequently encountered situations are those that

369 multiple mutations exhibit confounding effects for a phenotypically identified functional or  
370 structural feature, and undoubtedly, more and deep-sequencing data are still invaluable and  
371 irreplaceable.

372

## 373 **Conclusion**

374 This COVID-19 pandemic provides once-in-a-lifetime opportunity for the fields of  
375 biomedicine and other life sciences to work together on it as many facets as possible albeit  
376 exchanging with lives and other massive losses. If lessons told, we had learned things in serious  
377 ways in the last two CoV epidemics and we did prepare ourselves with vaccines and medication  
378 since, we would not have suffered this much this time. If one assumes that the last two  
379 outbreaks of SARS-CoV and MERS-CoV came surely by chances, this time SARS-CoV-2 is  
380 here for real, and a worst-case scenario is that it may stay with us forever or until effective  
381 vaccination is developed. Nevertheless, it certainly will stay with us for quite a while for many  
382 reasons [11]. First, at least it and other within-population versions of coronaviruses will  
383 definitely come again because we have not been able to trace its origin and ways its  
384 transmission from the very beginning, neither the Wuhan outbreak nor the recent Beijing  
385 outbreak in China even guided with very strict quarantine roles and prompt action plans. Next,  
386 this particular virus, SARS-CoV-2, has evolved to a composition status where some of its  
387 natural yet genetically distant hosts or possible intermediate mammalian hosts have acquired  
388 similar status [33, 34]. Furthermore, we do not yet have enough data to really map out the  
389 phylogenetic position that allows us to pinpoint its natural origin and human transmission  
390 routes.

391 The number one needs for us is data, genomic and clinical data, which should be as  
392 complete as possible and with characteristics including high-quality and high-coverage at  
393 single-molecule resolution. We currently have been acquiring genomic data and the specialized  
394 databases have collections over ten thousand non-redundant sequence variations, but still not  
395 enough to address more than a few possible functional changes of some key protein  
396 components [35–38], let alone understanding mutation-centric cellular mechanisms. Based on  
397 median and mean estimates, we have on average a mutation accumulation rate of half a dozen  
398 per patient. Although there have been data reported from single-molecule sequencing platform  
399 but they are low in coverage [39].

400 Our final notion is to emphasize the importance of analysis strategies and supporting  
401 platforms. Since questions always overwhelm what we can possibly address [40], prioritizing

402 tasks are of essence together with choices of strategies. The first platform to be established  
403 concerns mutation-to-function interpretation, where we have present one in this report. Another  
404 to be considered is mathematic modeling, such as cellular and disease transmissions [41–46]  
405 and viral mutation-selection paradigm, for testing and evaluating different parameters and  
406 prioritizing what kind of data to be acquired with high priorities. In addition, cellular and  
407 molecular data, including different omics studies [47], all need to be incorporated into a  
408 COVID-19 knowledgebase, where information from multi-disciplinary studies are managed,  
409 organized, and mined.

410

## 411 **Materials and Methods**

### 412 **SARS-CoV-2 and other related coronaviruses sequences**

413 We used the public-available SARS-CoV-2 data collected worldwide among the major  
414 databases, including CNCB/NGDC [48], CNGBdb [49], GISAID [32], GenBank [50] and  
415 NMDC [51] on June 12<sup>th</sup>, 2020. To ensure authenticity and reliability, our datasets must meet  
416 the following criteria: (1) The genome sequence is labeled as complete that covers all coding  
417 regions of the reference genome (GenBank accession NC\_045512.2). (2) It has no more than  
418 15 uncertain bases that often substituted as “N”s. (3) It has no more than 50 degenerate bases  
419 that often labeled as discrete nucleotides. These high-quality genomes were aligned to the  
420 reference using MUSCLE (version 3.8.31) with default parameter settings [52]. Further  
421 analyses of SARS-CoV-2 and related CoV genomes are referenced to genome annotation of  
422 the same reference genome (NC\_045512.2) and other information provided by the RefSeq  
423 database at NCBI.

424 Other closely related CoV genome sequences used include hsa-betaCoV-HKU1, hsa-  
425 betaCoV-OC43, ave-gamaCoV, mga-gamaCoV, smu-alphaCoV-WS, hsa-alphaCoV-229E,  
426 hsa-alphaCoV-NL63, taf-alphaCoV-NL63, MERS-CoV (from human and camel hosts), cdr-  
427 betaCoV-B73, SARS-CoV (from human and civet hosts), pla-betaCoV-SZ3 and raf-betaCoV-  
428 RaTG13 are retrieved from NCBI and mja-betaCoV-P4L are retrieved from NGDC. A full  
429 listing of our sequences dataset including virus genre, strain name, accession number and  
430 sources is provided in Table S3.

431

### 432 **Calculation of genomic composition parameters**

433 We display several genomic composition dynamics and its parameters (G+C content, A+G  
434 content and GC skew) using different sliding windows. The first 300 nt are grouped as an initial

435 window, and subsequent windows are uniformly shifted in a 21-nt step. Within these displays,  
436 the G+C contents referenced to the three codon positions of each open reading frame or ORF  
437 are measured by adjusting the sliding window according to the ORF lengths within viral  
438 genomes. As for ORFs longer than 2000 nt, a relatively large window size (300 nt) is adopted,  
439 and the step size is calculated via a custom formula  $round\left(\frac{length_{ORF}-300}{600}\right) - vb$ ,  $0 \leq vb \leq 2$   
440 where  $length_{ORF}$  denotes the length of ORF and  $vb$  varied from zero to two bases to make  
441 sure the window size is divisible by 3; for ORFs with a medium size (longer than 500 bases  
442 and shorter than 2000 nt), the window size is defined as  $round\left(\frac{1}{4} * length_{ORF}\right) - vb$ ,  $0 \leq$   
443  $vb \leq 2$ , while the step size is simply defined as 3 nt; as for those small ORFs (shorter than 500  
444 nt) such as structural proteins, a constant 21-nt window size and 3-nt step size is used for  
445 calculating genomic composition frequency.

446 The criteria for choosing the representative CoV genome sequences for constructing a  
447 representative phylogenetic tree (Figure 2) are multi-fold. First, we include all 7 human-  
448 infecting coronaviruses for the analysis, which are SARS-CoV, SARS-CoV-2, MERS-CoV,  
449 hsa-alphaCoV-229E, hsa-betaCoV-OC43, hsa-betaCoV-HKU1, and hsa-alphaCoV-NL63 (a  
450 prefix hsa- standing for *Homo sapiens* was used to label the unfamiliar human-infecting CoVs).  
451 Second, we categorized all human-infecting, for simplicity, into 4 lineages: SARS-CoV-2,  
452 SARS-CoV, MERS-CoV, and the older human CoV lineages. Therefore, their related CoVs in  
453 the literature were also selected for the analysis, including a single closely-related CoVs for  
454 each lineage (based on sequence identity): SARS-CoV-related (pla-betaCoV-SZ3), MERS-  
455 CoV-related (cdr-betaCoV-B73), SARS-CoV-2 related (raf-betaCoV-RaTG13), and NL63-  
456 related (taf-alphaCoV-NL63; both species and CoV genera were labelled for clarity). Third,  
457 we also added more informative CoV genome sequences to enrich lineage-associated  
458 information, which are a pangolin coronavirus genome (mja-betaCoV-P4L) reported to be  
459 closed to SARS-CoV-2 and 3 non-beta-coronaviruses that infect animals (e.g., ave-gamaCoV  
460 from gamma-coronavirus genus and smu-alphaCoV-WS from alpha-coronavirus genus).  
461 Fourth, we only used complete protein-coding sequences from the CoVs to construct the  
462 phylogenetic tree and to calculate genome parameter contents. The sequences were aligned by  
463 using MUSCLE and the UPGMA tree was constructed by using MEGA-X [53]. The G+C  
464 content and single nucleotide content of each virus genome at three codon positions was also  
465 calculated. Subgenomes of SARS-CoV was obtained from Marra et al [54], and we annotated  
466 the subgenomes of SARS-CoV-2, mja-betaCoV-P4L, and raf-betaCoV-RaTG13 based on the  
467 annotation of NCBI (GenBank accession NC\_045512.2). In addition, G+C and single

468 nucleotide contents of the complete genome and its subgenomes of these four viruses at three  
469 codon positions were displayed to serve as sequence composition references.

470

#### 471 **Variation calling and categorization**

472 All sequence variations are identified and categorized based on comparisons between the query  
473 and the reference genomes, and files were generated by using an in-hoc Perl scripts based on  
474 alignment results. The tailored annotation (gene, location and consequence on the protein  
475 sequence) of each variant is determined with VEP (version 99.0) [55]. Since a large number of  
476 gaps and low-quality sequences at the 3' and 5' ends, variations (substitutions, insertions and  
477 deletions or indels) occurring 50 nt each at 5'- and 3'-ends of the genome are not considered.  
478 Since the higher quartile of variations per genome among SARS-CoV-2 populations is 9  
479 (based on the 22,051 sequences we analyzed in this study), we filtered out the problematic sites  
480 that exceed 50 variations as compared to the reference genome. CoV genome sequences have  
481 at least one mutation are used in this study. A full listing of variations among coding regions  
482 identified in this study is provided in Table S4.

483 All continuously updated mutation files of the SARS-CoV-2 populations in variant call  
484 format (version 4.2) are deposited at the variation page of the 2019nCoV database contributed  
485 by CNCB/NGDC (<https://bigd.big.ac.cn/ncov/variation/>).

486

#### 487 **Mutation spectrum analysis**

488 A mutation spectrum for within-population variations is composed of two lines of information;  
489 one concerns mutations that are referenced to a population consensus built based on the entire  
490 collection, and the other contains frequencies of all mutations and their directional changes,  
491 i.e., permutations. To reduce pitfalls of sequencing errors, we only selected mutations that  
492 occur more than twice in the whole collection of SARS-CoV-2 populations (clades or clade  
493 clusters that are often defined based on phylogenetic analysis). In theory, there are 16 possible  
494 permutations but 4 of them are unrecognizable so that 12 permutations (C-to-U, A-to-G, U-to-  
495 C, G-to-A, G-to-U, U-to-G, A-to-C, C-to-A, U-to-A, G-to-C, C-to-G and A-to-U) are there as  
496 an informative set. When the number of CoV genomes collected are limited, such as SARS-  
497 CoVs and MERS-CoVs, entire data sets are pooled together without clades. In our analyses on  
498 SARS-CoVs and MERS-CoVs (Figure S3A), we aligned sequences from these two lineages to  
499 their reference genomes (SARS-CoV: NC\_004718.3; MERS-CoV: NC\_019843.3) to call  
500 variations. When aligned on overlapping sequences, due to large deletions and additional ORFs,  
501 are encountered, we always choose the largest or only one of the ORFs to represent the segment,

502 respectively. For example, in SARS-CoV lineage, if a mutation falls into the overlapping  
503 region of ORF9a (encoding the N protein) and ORF9b, we have only used the ORF9a  
504 annotations to avoid redundancy.

505

### 506 **Phylogeny constructing**

507 Given the scale of SARS-CoV-2 sequence collections, we focused on genomes with unique  
508 information contributing to phylogenetic analysis. First, mutations (including single-nucleotide  
509 substitution and indels) at frequencies equal or greater than 10 in between-clade or –population  
510 calls were selected. FastTree (version 2.1.11) [56] is used to construct maximum likelihood  
511 phylogeny based on 5,121 genomes that have met our criteria, and iTol [57], an interactive web  
512 server was employed for setting an unrooted format and annotating samples.

513 For Figure S4, the neighbor-joining method is used for constructing phylogeny from the  
514 Euclidean distance of the mutation frequency matrix of clades, and the tree was generated and  
515 visualized by R package phangorn [58] and ggtree [59].

516

### 517 **Estimation of G+C and purine contents of genome sequences**

518 G+C and purine (or A+G) contents of CoVs in general vary in a narrow range, and therefore,  
519 subtleties among the content changes have to be scrutinized with low-quality sequences  
520 excluded. A more sensitive approach is used in this study where two points are assumed; all  
521 genomes are full-length and variant alleles in coding sequences are the varied composition.  
522 The absolute frequencies of A+G and G+C content are defined as:

523

$$524 \quad \text{Genomic AG content} = \frac{8954 + 5492 + (A_{alt} - A_{ref}) + (G_{alt} - G_{ref})}{29903 - (Del_{alt} - Ins_{alt})} \quad (1)$$

525 and

$$526 \quad \text{Genomic GC content} = \frac{5492 + 5863 + (G_{alt} - G_{ref}) + (C_{alt} - C_{ref})}{29903 - (Del_{alt} - Ins_{alt})} \quad (2)$$

527

528 where 8,954, 5,492, 5,863, and 29,903 are the frequencies of A, G, C and total length of the  
529 SARS-CoV-2 reference, respectively. For any sequence compared with the reference, the  
530  $Del_{alt}$  and  $Ins_{alt}$  measures the deleted and inserted nucleotides of this sequence, respectively,  
531 and that is why  $(Del_{alt} - Ins_{alt})$  means the variation of sequence length. For all the variant  
532 sites in this sequence,  $(A_{alt} - A_{ref}) + (G_{alt} - G_{ref})$  in Equation (1) measures the number of  
533 A and G variations in compared sequence,  $A_{alt}$  and  $G_{alt}$  denote the number of nucleotides



534 mutated to A or G while  $A_{ref}$  and  $G_{ref}$  represent the number of nucleotides mutated from A or  
535 G. Similarly,  $(G_{alt} - G_{ref}) + (C_{alt} - C_{ref})$  in Equation (2) represents the varied number of G  
536 and C among compared sequences.

537

### 538 **Clade subgrouping**

539 To detect trend followers and disrupters in mutation spectra, a pipeline was developed to select  
540 such genomes and mutations within clades iteratively. The first step includes locating high-  
541 frequency mutations (major alleles, MA) in a clade and extracting all genomes without this  
542 MA mutation to form a subset of the clade. The second step is, within the new subclade, to  
543 iterate the process until such mutations are thoroughly identified and no more mutations exceed  
544 a manually set threshold of MAF. Since the number of unique variations among clades have  
545 been varying significantly over time, the thresholds are 0.05 in C01, C04, C06, C08 and C09;  
546 0.1 in C02, C03, C05 and C07. The proportion of permutations in each subclade and the located  
547 gene and mutation type (synonymous or non-synonymous) of mutations are provided in Table  
548 S5.

549

### 550 **Authors' contributions**

551 JY designed, supervised, and coordinated the study. SS, ZZ and JX participated in the  
552 design of the study. XT, QL, ZL, YZ, GN performed the data analysis. JY, SS, XT, QL, ZL,  
553 YZ designed and drew the figures. JY and XT drafted the manuscript. JY, ZZ, SS, QL and  
554 XT revised the manuscript. All authors read and approved the final manuscript.

555

### 556 **Competing interests**

557 The authors have declared no competing interests.

558

### 559 **Acknowledgements**

560 This work was supported by grants from The Strategic Priority Research Program of the  
561 Chinese Academy of Sciences [XDA19090116 to S.S., XDA19050302 to Z.Z.], National Key  
562 R&D Program of China [2020YFC0848900, 2017YFC0907502], 13th Five-year  
563 Informatization Plan of Chinese Academy of Sciences [XXH13505-05], K. C. Wong Education  
564 Foundation to Z.Z., and International Partnership Program of the Chinese Academy of Sciences  
565 [153F11KYSB20160008]. The Youth Innovation Promotion Association of Chinese Academy  
566 of Science [2017141 to S.S.]; Funding for open access charge: The Youth Innovation

567 Promotion Association of Chinese Academy of Science. We thank our colleagues and students  
568 for their hard working on the 2019nCoV (<https://bigd.big.ac.cn/ncov>). We thank Dr. Lina Ma,  
569 Lili Hao, and Meng Zhang for useful suggestions and discussion of this manuscript.

570

## 571 **References**

572 [1] Wu F, Zhao S, Yu B, Chen Y-M, Wang W, Song Z-G, et al. A new coronavirus associated  
573 with human respiratory disease in China. *Nature* 2020;579:265–9.

574 [2] World Health Organization. Coronavirus disease (COVID-2019) situation report - 144.  
575 <https://www.who.int/emergencies/diseases/novel-coronavirus-2019/situation-reports> (Jun 12  
576 2020, date last accessed).

577 [3] He X, Lau EHY, Wu P, Deng X, Wang J, Hao X, et al. Temporal dynamics in viral shedding  
578 and transmissibility of COVID-19. *Nat Med* 2020;26:672–5.

579 [4] Zou L, Ruan F, Huang M, Liang L, Huang H, Hong Z, et al. SARS-CoV-2 Viral Load in  
580 Upper Respiratory Specimens of Infected Patients. *N Engl J Med* 2020;382:1177-9.

581 [5] Wu Z, McGoogan JM. Characteristics of and Important Lessons From the Coronavirus  
582 Disease 2019 (COVID-19) Outbreak in China: Summary of a Report of 72314 Cases From the  
583 Chinese Center for Disease Control and Prevention. *JAMA* 2020.

584 [6] Coronaviridae Study Group of the International Committee on Taxonomy of Viruses. The  
585 species Severe acute respiratory syndrome-related coronavirus: classifying 2019-nCoV and  
586 naming it SARS-CoV-2. *Nat Microbiol* 2020;5:536–44.

587 [7] Zhu N, Zhang D, Wang W, Li X, Yang B, Song J, et al. A Novel Coronavirus from Patients  
588 with Pneumonia in China, 2019. *N Engl J Med* 2020;382:727–33.

589 [8] Cui J, Li F, Shi Z-L. Origin and evolution of pathogenic coronaviruses. *Nat Rev Microbiol*  
590 2019;17:181–92.

591 [9] de Wit E, van Doremalen N, Falzarano D, Munster VJ. SARS and MERS: recent insights  
592 into emerging coronaviruses. *Nat Rev Microbiol* 2016;14:523–34.

593 [10] Fung TS, Liu DX. Human Coronavirus: Host-Pathogen Interaction. *Annu Rev Microbiol*  
594 2019;73:529–57.

595 [11] Yu J. From Mutation Signature to Molecular Mechanism in the RNA World: A Case of  
596 SARS-CoV-2. *Genomics Proteomics Bioinformatics* 2020;in press.

597 [12] Guo Y-R, Cao Q-D, Hong Z-S, Tan Y-Y, Chen S-D, Jin H-J, et al. The origin, transmission  
598 and clinical therapies on coronavirus disease 2019 (COVID-19) outbreak - an update on the  
599 status. *Mil Med Res* 2020;7:11.

- 600 [13] Smith EC, Blanc H, Surdel MC, Vignuzzi M, Denison MR. Coronaviruses lacking  
601 exoribonuclease activity are susceptible to lethal mutagenesis: evidence for proofreading and  
602 potential therapeutics. *PLoS Pathog* 2013;9:e1003565.
- 603 [14] Simmonds P. Rampant C→U Hypermutation in the Genomes of SARS-CoV-2 and Other  
604 Coronaviruses: Causes and Consequences for Their Short- and Long-Term Evolutionary  
605 Trajectories. *mSphere* 2020;5.
- 606 [15] Di Giorgio S, Martignano F, Torcia MG, Mattiuz G, Conticello SG. Evidence for host-  
607 dependent RNA editing in the transcriptome of SARS-CoV-2. *Sci Adv* 2020;6:eabb5813.
- 608 [16] Xiao J, Yu J. A scenario on the stepwise evolution of the genetic code. *Genomics*  
609 *Proteomics Bioinformatics* 2007;5:143–51.
- 610 [17] Yu J. A content-centric organization of the genetic code. *Genomics Proteomics*  
611 *Bioinformatics* 2007;5:1–6.
- 612 [18] Zhang Z, Yu J. On the organizational dynamics of the genetic code. *Genomics Proteomics*  
613 *Bioinformatics* 2011;9:21–9.
- 614 [19] Zhang Z, Yu J. The pendulum model for genome compositional dynamics: from the four  
615 nucleotides to the twenty amino acids. *Genomics Proteomics Bioinformatics* 2012;10:175–80.
- 616 [20] DeWitte-Orr SJ, Collins SE, Bauer CMT, Bowdish DM, Mossman KL. An accessory to  
617 the 'Trinity': SR-As are essential pathogen sensors of extracellular dsRNA, mediating entry and  
618 leading to subsequent type I IFN responses. *PLoS Pathog* 2010;6:e1000829.
- 619 [21] Totura AL, Baric RS. SARS coronavirus pathogenesis: host innate immune responses and  
620 viral antagonism of interferon. *Curr Opin Virol* 2012;2:264–75.
- 621 [22] Crick FH. Codon–anticodon pairing: the wobble hypothesis. *J Mol Biol* 1966;19:548–55.
- 622 [23] Cui P, Lin Q, Ding F, Hu S, Yu J. The transcript-centric mutations in human genomes.  
623 *Genomics Proteomics Bioinformatics* 2012;10:11–22.
- 624 [24] Cui P, Ding F, Lin Q, Zhang L, Li A, Zhang Z, et al. Distinct contributions of replication  
625 and transcription to mutation rate variation of human genomes. *Genomics Proteomics*  
626 *Bioinformatics* 2012;10:4–10.
- 627 [25] Wong GK-S, Wang J, Tao L, Tan J, Zhang J, Passey DA, et al. Compositional gradients  
628 in Gramineae genes. *Genome Res* 2002;12:851–6.
- 629 [26] Lobry JR. Asymmetric substitution patterns in the two DNA strands of bacteria. *Mol Biol*  
630 *Evol* 1996;13:660–5.
- 631 [27] Wu Z, Lu L, Du J, Yang L, Ren X, Liu B, et al. Comparative analysis of rodent and small  
632 mammal viromes to better understand the wildlife origin of emerging infectious diseases.  
633 *Microbiome* 2018;6:178.

- 634 [28] Pan Y, Zhang D, Yang P, Poon LLM, Wang Q. Viral load of SARS-CoV-2 in clinical  
635 samples. *Lancet Infect Dis* 2020;20:411–2.
- 636 [29] Wang W, Xu Y, Gao R, Lu R, Han K, Wu G, et al. Detection of SARS-CoV-2 in Different  
637 Types of Clinical Specimens. *JAMA* 2020.
- 638 [30] Rambaut A, Holmes EC, O'Toole A, Hill V, McCrone JT, Ruis C, et al. A dynamic  
639 nomenclature proposal for SARS-CoV-2 lineages to assist genomic epidemiology. *Nat*  
640 *Microbiol* 2020.
- 641 [31] Tang X, Wu C, Li X, Song Y, Yao X, Wu X, et al. On the origin and continuing evolution  
642 of SARS-CoV-2. *National Science Review* 2020.
- 643 [32] Elbe S, Buckland-Merrett G. Data, disease and diplomacy: GISAID's innovative  
644 contribution to global health. *Glob Chall* 2017;1:33–46.
- 645 [33] Zhou H, Chen X, Hu T, Li J, Song H, Liu Y, et al. A Novel Bat Coronavirus Closely  
646 Related to SARS-CoV-2 Contains Natural Insertions at the S1/S2 Cleavage Site of the Spike  
647 Protein. *Curr Biol* 2020;30:2196-203 e3.
- 648 [34] Zhou P, Yang XL, Wang XG, Hu B, Zhang L, Zhang W, et al. A pneumonia outbreak  
649 associated with a new coronavirus of probable bat origin. *Nature* 2020;579:270–3.
- 650 [35] Becerra-Flores M, Cardozo T. SARS-CoV-2 viral spike G614 mutation exhibits higher  
651 case fatality rate. *Int J Clin Pract* 2020:e13525.
- 652 [36] Daniloski Z, Guo X, Sanjana NE. The D614G mutation in SARS-CoV-2 Spike increases  
653 transduction of multiple human cell types. *bioRxiv* 2020:2020.06.14.151357.
- 654 [37] Korber B, Fischer W, Gnanakaran S, Yoon H, Theiler J, Abfalterer W, et al. Spike  
655 mutation pipeline reveals the emergence of a more transmissible form of SARS-CoV-2.  
656 *bioRxiv* 2020:2020.04.29.069054.
- 657 [38] Zhang L, Jackson CB, Mou H, Ojha A, Rangarajan ES, Izard T, et al. The D614G mutation  
658 in the SARS-CoV-2 spike protein reduces S1 shedding and increases infectivity. *bioRxiv*  
659 2020:2020.06.12.148726.
- 660 [39] Wang M, Fu A, Hu B, Tong Y, Liu R, Gu J, et al. Nanopore target sequencing for accurate  
661 and comprehensive detection of SARS-CoV-2 and other respiratory viruses. *medRxiv*  
662 2020:2020.03.04.20029538.
- 663 [40] Teymoori-Rad M, Samadzadeh S, Tabarraei A, Moradi A, Shahbaz MB, Tahamtan A.  
664 Ten challenging questions about SARS-CoV-2 and COVID-19. *Expert Rev Respir Med* 2020.
- 665 [41] Liu Q, Zhao S, Shi C-M, Song S-H, Zhu S, Su Y, et al. Population genetics of SARS-  
666 CoV-2: disentangling sampling bias and clustering infections. *Genomics Proteomics*  
667 *Bioinformatics* 2020;in press.

- 668 [42] Cotten M, Watson SJ, Kellam P, Al-Rabeeah AA, Makhdoom HQ, Assiri A, et al.  
669 Transmission and evolution of the Middle East respiratory syndrome coronavirus in Saudi  
670 Arabia: a descriptive genomic study. *Lancet* 2013;382:1993–2002.
- 671 [43] Gire SK, Goba A, Andersen KG, Sealfon RSG, Park DJ, Kanneh L, et al. Genomic  
672 surveillance elucidates Ebola virus origin and transmission during the 2014 outbreak. *Science*  
673 2014;345:1369–72.
- 674 [44] Lemey P, Suchard M, Rambaut A. Reconstructing the initial global spread of a human  
675 influenza pandemic: A Bayesian spatial-temporal model for the global spread of H1N1pdm.  
676 *PLoS Curr* 2009;1:RRN1031.
- 677 [45] Smith GJD, Vijaykrishna D, Bahl J, Lycett SJ, Worobey M, Pybus OG, et al. Origins and  
678 evolutionary genomics of the 2009 swine-origin H1N1 influenza A epidemic. *Nature*  
679 2009;459:1122–5.
- 680 [46] Yu W-B, Tang G-D, Zhang L, Corlett RT. Decoding the evolution and transmissions of  
681 the novel pneumonia coronavirus (SARS-CoV-2 / HCoV-19) using whole genomic data. *Zool*  
682 *Res* 2020;41:247–57.
- 683 [47] Sanders W, Fritch EJ, Madden EA, Graham RL, Vincent HA, Heise MT, et al.  
684 Comparative analysis of coronavirus genomic RNA structure reveals conservation in SARS-  
685 like coronaviruses. *bioRxiv* 2020:2020.06.15.153197.
- 686 [48] National Genomics Data Center M, Partners. Database Resources of the National  
687 Genomics Data Center in 2020. *Nucleic Acids Res* 2020;48:D24–D33.
- 688 [49] Wang B, Liu F, Zhang EC, Wo CL, Chen J, Qian PY, et al. The China National GeneBank  
689 horizontal line owned by all, completed by all and shared by all. *Hereditas(Beijing)*  
690 2019;41:761-72.
- 691 [50] Sayers EW, Cavanaugh M, Clark K, Ostell J, Pruitt KD, Karsch-Mizrachi I. GenBank.  
692 *Nucleic Acids Res* 2020;48:D84–D6.
- 693 [51] Wu L, Sun Q, Desmeth P, Sugawara H, Xu Z, McCluskey K, et al. World data centre for  
694 microorganisms: an information infrastructure to explore and utilize preserved microbial  
695 strains worldwide. *Nucleic Acids Res* 2017;45:D611–D8.
- 696 [52] Edgar RC. MUSCLE: multiple sequence alignment with high accuracy and high  
697 throughput. *Nucleic Acids Res* 2004;32:1792–7.
- 698 [53] Kumar S, Stecher G, Li M, Knyaz C, Tamura K. MEGA X: Molecular Evolutionary  
699 Genetics Analysis across Computing Platforms. *Mol Biol Evol* 2018;35:1547-9.
- 700 [54] Marra MA, Jones SJ, Astell CR, Holt RA, Brooks-Wilson A, Butterfield YS, et al. The  
701 Genome sequence of the SARS-associated coronavirus. *Science* 2003;300:1399-404.

702 [55] McLaren W, Gil L, Hunt SE, Riat HS, Ritchie GRS, Thormann A, et al. The Ensembl  
703 Variant Effect Predictor. *Genome Biol* 2016;17:122.

704 [56] Price MN, Dehal PS, Arkin AP. FastTree 2--approximately maximum-likelihood trees for  
705 large alignments. *PLoS One* 2010;5:e9490.

706 [57] Letunic I, Bork P. Interactive Tree Of Life (iTOL) v4: recent updates and new  
707 developments. *Nucleic Acids Res* 2019;47:W256–W9.

708 [58] Schliep KP. phangorn: phylogenetic analysis in R. *Bioinformatics* 2011;27:592–3.

709 [59] Yu G. Using ggtree to Visualize Data on Tree-Like Structures. *Curr Protoc Bioinformatics*  
710 2020;69:e96.

711

## 712 **Figures**

### 713 **Figure 1 A display of genome compositional dynamics of SARS-CoV-2 and related CoVs**

714 **A.** The complete genome sequence of SARS-CoV-2 (NC\_045512.2), including both structural  
715 and non-structural components. **B.** We use a 300-nt sliding window with a 21-nt step to show  
716 dynamic changes of genome G+C, purine, GC1 to GC3, and GC skew (G-C/G+C) contents  
717 over the entire genomes. **C.** A similar procedure as described above is applied to individual  
718 ORFs and proteins. Note that the GC skews are not uniform over the genome length and the  
719 observation suggests possible recent recombination among closely related CoVs.

### 720 **Figure 2 Nucleobase contents of genomes and subgenomes of SARS-CoV-2 and related** 721 **CoVs**

722 **A.** A schematic phylogenetic tree is used to cluster genome sequences and compositional  
723 variables (15 CoVs genome sequences, from top to bottom, are: hsa-betaCoV-HKU1, hsa-  
724 betaCoV-OC43, ave-gamaCoV, mga-gamaCoV, smu-alphaCoV-WS, hsa-alphaCoV-229E,  
725 hsa-alphaCoV-NL63, taf-alphaCoV-NL63, MERS-CoV, cdr-betaCoV-B73, SARS-CoV, pla-  
726 betaCoV-SZ3, mja-betaCoV-P4L, SARS-CoV-2, and raf-betaCoV-RaTG13). These  
727 compositional variables include GC contents at three codon positions (codon positions 1, 2,  
728 and 3 are denoted as GC1, GC2, and GC3) and single nucleotide contents at three codon  
729 positions (A1, A2, A3; U1, U2, U3; G1, G2, G3; and C1, C2, C3). Nucleotides are labeled in  
730 different shapes: purines, triangles; pyrimidines, open circles. A and U or G and C are colored  
731 blue or red, respectively. It becomes obvious that the two closely-related CoV genomes to  
732 SARS-CoV-2, the reported bat (raf-betaCoV-RaTG13) and the pangolin (mja-betaCoV-P4L)  
733 have very similar codon G+C content as well as base contents. The cp1 (codon position 1) base  
734 content appears most characteristic of balanced purine content of SARS-CoV-2 and its close

735 relatives. The cp2 (codon position 2) base content of SARS-CoV-2 and all other CoVs has  
736 higher and relatively balanced A+U content. The older human CoVs have either lowest or  
737 higher G+C content and unbalanced purine contents. Note that G+C contents in three codon  
738 positions are labeled differently from those of single nucleotide contents in color codes. G+C  
739 content represents a single measure but single nucleotide contents demonstrate trends of all  
740 four nucleotides. **B.** The G+C and single nucleotide contents at different codon positions of  
741 complete genomes and subgenomes of SARS-CoV-2, SARS-CoV, mja-betaCoV-P4L, and raf-  
742 betaCoV-RaTG13 are displayed to illustrate the driving force for G+C content decrease toward  
743 3' end of the genome, which is rather a result of, in terms of mechanism, the increased U  
744 content and C-to-U permutation. The negative gradient of U is also obvious from the 5' end to  
745 the 3' end.

746 **Figure 3 Mutation spectra of SARS-CoV-2 in a context of G+C contents and codon**  
747 **positions**

748 **A.** The SARS-CoV-2 mutation spectrum is composed of 12 permutations and they are divided  
749 by codon positions among all mutations. C-to-U (CU), U-to-C (UC), A-to-G (AG), G-to-A  
750 (GA), and G-to-U (GU), are always dominant due to two principles; one is that the first four  
751 permutations occur when positive-sense genome is synthesized, and the other is that a G-by-A  
752 replacement is always preferred by RTCs so that G-to-U permutation as the most dominant  
753 occurring when the antigenome serves as a template. **B.** C-to-U permutations at cp3 diminish  
754 among non-synonymous mutations and this phenomenon indicates that most protein  
755 composition relevant variations are cp1 and cp2 variations. The remaining non-synonymous  
756 mutations in G-to-U (GU) permutation may be a result of biased strand synthesis. **C.** Displays  
757 of permutation-to-codon changes among non-synonymous mutations. The codon table is  
758 divided into two halves: the pro-diversity half (blue) whose cp3 is sensitive to transitional  
759 change and the pro-robust half (purple) whose cp3 position is insensitive to any change. Two  
760 examples, C-to-U (1051 in counts) and A-to-G (314 in counts) permutations are shown here.  
761 When a codon has a C-to-U change, the codon position varies, results of such changes relative  
762 to codon positions are summarized on both sides of the codon flow chart. Note that cp1 and  
763 cp2 changes appear more than those of cp3. The ratio between codons of pro-robust half and  
764 pro-diversity half is displayed on each bar. **D.** All permutations are plotted against the reference  
765 genome sequence to show how changes are related to amino acids. In the molecular weight  
766 index, most cp1 and cp2 changes are most obvious, showing an increasing trend. In the  
767 hydrophobicity index, most cp1 and cp2 changes increase toward less hydrophobicity.

768 **Figure 4 Sequence-variation-based phylogenies of SARS-CoV-2**

769 **A.** CoV genomes are divided into clades and clade clusters based on high-frequency mutations  
770 among the genome sequences. The shared variations are excellent indicators for shared  
771 ancestors and those between clusters (blue half parentheses) and within clusters (red half  
772 parentheses) are labeled with positions and nucleotide variations that are all referenced to the  
773 SARS-CoV-2 genome (NC\_045512.2), its positions, and relative frequencies (thin vertical  
774 bars). The dates when each clade started are also indicated. **B.** The current collection shows 9  
775 clades (C01 to C09) in three clusters (S, L and G). An unrooted phylogenetic tree of the clades  
776 and clusters (color-coded), the tree scale is 0.01.

777 **Figure 5 Mutation spectrum and composition dynamics among 9 SARS-CoV-2 clades**

778 **A.** Plots showing permutation variation of each clade. Aside from the 5 dominant permutations,  
779 A-to-C (R2 permutation), U-to-G (R2 permutation) and A-to-U (R12 permutation) changes  
780 appear also significant; such an increase in proportion of R2 and R12 permutations often  
781 indicates copy number (synthesis) bias between the two strands. **B.** When permutations are  
782 grouped based on structure-conformation model (Figure S5) into tight and loose groups (a four-  
783 parameter model), their trends of changes become obvious. The R-tight discourages A-by-G  
784 replacement but encourages C-by-U replacement when the genome is replicated. The loose  
785 statuses, regardless R-loose or Y-loose, place no pressure on permutation variability. **C.** Violin  
786 plots showing the G+C content among clades. **D.** Violin plots showing the purine content  
787 among the clades. C08 and C09 have been drifting both contents toward lower ends. C03 has  
788 also been drifting in a greater extent of its purine content and a lesser extent of its G+C content,  
789 comparatively. **E.** The mean (solid circles) and median (solid triangles) of G+C and purine  
790 contents among clades. The same three more expressive clades, as seen in (C) and (D), are  
791 indeed obvious (inset). **F.** The compositional dynamics of cp3 nucleotides that are less selected  
792 and with a stringent cutoff value ( $>$  or  $=5$ ). **G.** Composition distributions based on major alleles,  
793 at frequencies equal or greater than 0.01 to emphasize the effect from selection. **H.**  
794 Composition distributions based on major alleles at frequencies equal or greater than 0.05. **I.**  
795 Composition distributions based on major alleles at frequencies equal or greater than 0.1.

796 **Figure 6 Within-clade permutation variations are excellent indicators of functional**  
797 **mutations**

798 **A.** An example of permutation shifting of clade C02 and among its subclades. The number of  
799 SARS-CoV-2 genomes is indicated in the parentheses. The clear trends are two-fold. First,  
800 decreased C-to-U permutation is coupled with increased A-to-G and decreased G-to-U  
801 permutations. Second, A-to-U permutation is also increased as expected based on the model  
802 shown in Figure S5. These trends of permutation changes suggest irrelevant to the ratio of



803 strand-biased synthesis (positive sense vs negative sense) but possible structural and/or  
804 conformational variation in the RTCs. **(B) – (F)** show within-clade permutation changes of  
805 C02, C04, C03, C05 and C07. In each display, the first column of the x-axis shows the  
806 proportion of permutations calculated for each clade. Two opposite trends of permutation  
807 variations are seen between C03 and C04, and C07 has a rather wavy pattern.

808

## 809 **Supplementary material**

### 810 **Supplementary Figure S1 A display of genome compositional dynamics of SARS-CoV, 811 MERS-CoV and their within-population CoVs**

812 We use a 300-bp sliding window with a 21-bp step to show dynamic changes of genome G+C,  
813 purine, GC1 to GC3, and GC skew (G-C/G+C) contents. The complete genome sequences and  
814 data sources are listed in Table S1.

### 815 **Supplementary Figure S2**

816 **A.** G+C and purine content plot to show how these contents distribute among human CoVs.  
817 Note that all older human CoVs are drifted toward lower G+C and purine contents, and this  
818 phenomenon indicates lower selection pressure or insensitivity on composition changes. Full  
819 names of the human CoVs are listed in the legend of Figure 2. **B.** A genetic code table to show  
820 how nucleotide permutations are related to codons. The table is divided into two halves  
821 (colored and uncolored backgrounds) and cp1 and cp2 relative to their permutations sensitivity  
822 and changes are indicated with half parentheses with color-coding: C-to-U|U-to-C and A-to-  
823 G|G-to-A, red; G-to-U|U-to-G and A-to-C and C-to-U, blue; and A-to-U|U-to-A and G-to-C|C-  
824 to-G, green. Note that cp1 and cp2 are sensitive to column and row codon swaps, respectively.  
825 Cp3 is in a unique position where only half of the codons are sensitive to its changes, and the  
826 other half is so organized that some codons are more permissive than others.

### 827 **Supplementary Figure S3 Mutation spectra of SARS-CoV-2 in a context of codon 828 positions**

829 **A.** MERS-CoV and SARS-CoV mutation spectra are composed of 12 permutations and they  
830 are divided by codon positions. C-to-U (CU) permutations are always as dominant as what  
831 SARS-CoV-2 shows. The mutation counts are partitioned into synonymous and non-  
832 synonymous mutations. **B.** C-to-U permutations at cp3 diminish among non-synonymous  
833 mutations and this phenomenon indicates that most protein composition relevant variations are  
834 cp1 and cp2 variations. Note that all older human CoVs are drifted toward lower G+C and  
835 purine contents, and this phenomenon indicates lower selection or insensitivity on composition

836 changes. Full names of the human CoVs are listed in the legend of Figure 2. Mutation counts  
837 are calculated from non-synonymous mutations. **C.** Displays of permutation-to-codon changes  
838 among non-synonymous mutations. The permutations showed here contain U-to-C, G-to-A,  
839 G-to-U, C-to-A, U-to-G, A-to-C, A-to-U, G-to-C, U-to-A and C-to-G.

#### 840 **Supplementary Figure S4 High-frequency within-clade mutations**

841 Signature site information and frequency table of star mutations in each clade, with a neighbor-  
842 joining tree based on the frequency data in the table.

#### 843 **Supplementary Figure S5**

844 This table illustrates how 12 permutations are related to G+C and purine contents and the subtle  
845 RTC specificity of CoVs. Mutations occur when the positive-sense RNA genome (R1,  
846 mutation happens when the negative-sense genome is synthesized) or its negative-sense  
847 subgenomes are synthesized (R2). The G+C content insensitive permutations occur after two  
848 syntheses (R12). CU and A-to-G (AG) are preferred when RTC is in a status that encourages  
849 a large-to-small substrate exchange in a higher ratio than the opposite, small-to-large substrate  
850 exchange. We term this preferred exchange as “tight” status. This status is also divided into R-  
851 tight (R, purine; to indicate that the mechanism is an A-by-G replacement) and Y-tight (Y,  
852 pyrimidine; to indicate that the mechanism is a C-by-U replacement). When an exchange of  
853 substrate happens from small-to-large, it is referred as a “loose” status that is also divided into  
854 two, R-loose and Y-loose. Note that some permutations are not sensitive to G+C and purine  
855 contents but others are sensitive. Arrow-headed dashed lines connect R1 permutation to R12  
856 permutations, and note that cross-column relationship is rather striking, which re-routes some  
857 structural principles, which navigates mutation forces on one hand and leaves room for  
858 selection to work on, on the other hand.

#### 859 **Supplementary Figure S6 Within-clade permutation variations are excellent indicators 860 of functional mutations**

861 (A) – (D) show within-clade permutation changes of C06, C08, C09 and C01.

862

#### 863 **Supplementary Table S1 The mutation counts in each clade and cluster**

#### 864 **Supplementary Table S2 The proportion of permutations in each clade and clusters 865 based on different genomic regions**

#### 866 **Supplementary Table S3 Selected CoV genome sequences used for this study**

#### 867 **Supplementary Table S4 The SARS-Cov-2 mutation table on coding region (based on 868 data on June 12th 2020)**

869 **Supplementary Table S5 The proportion of permutations in each clade and their**  
870 **subclades**

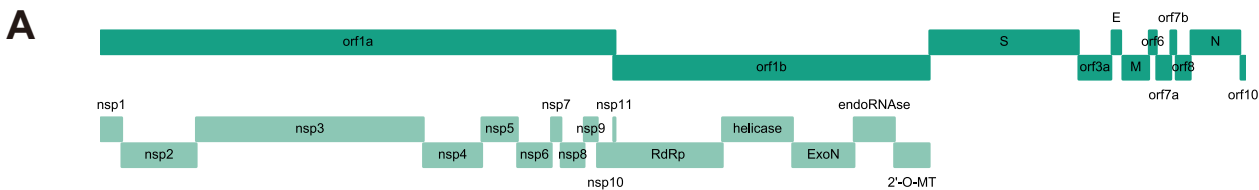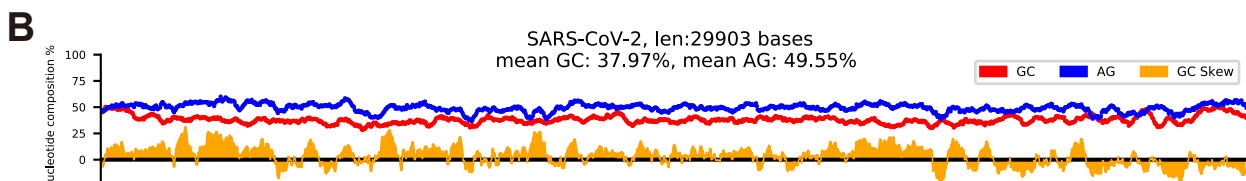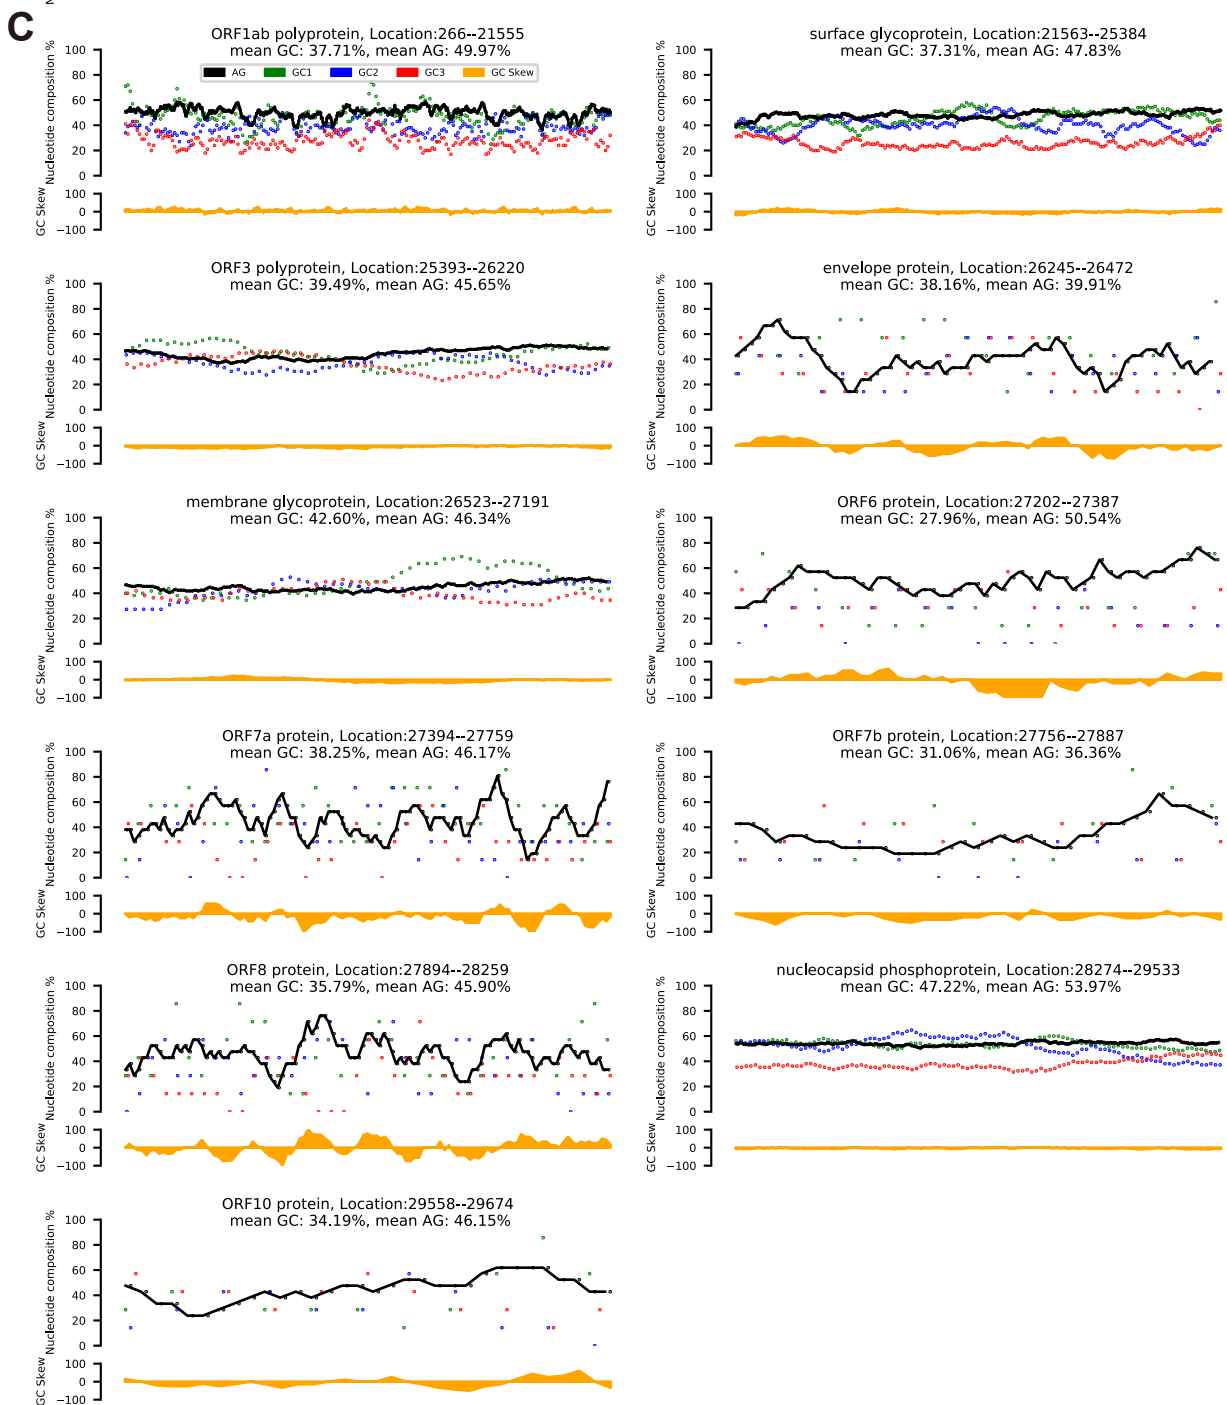



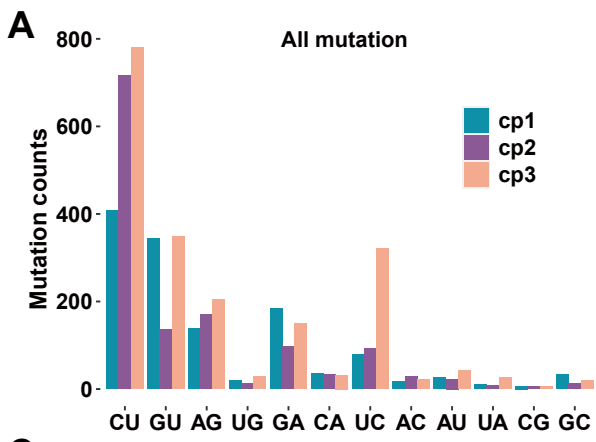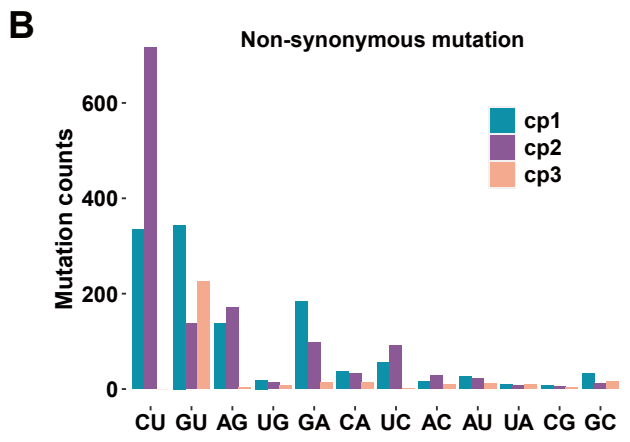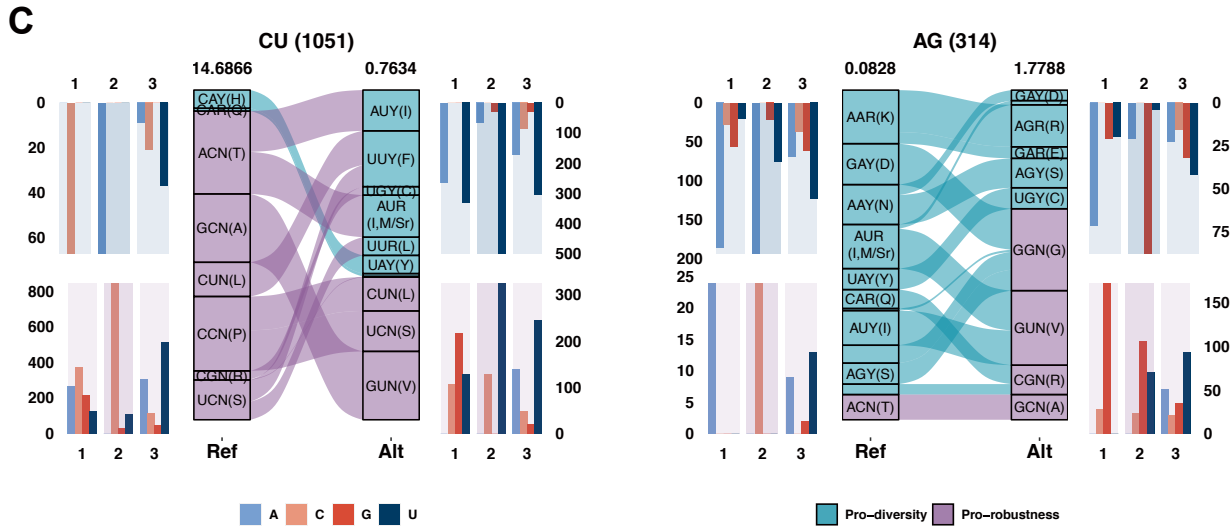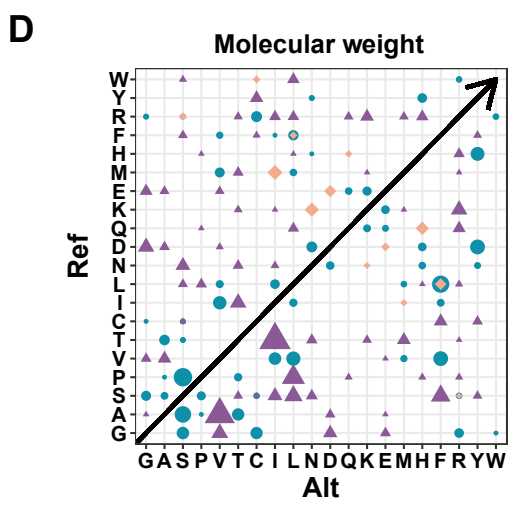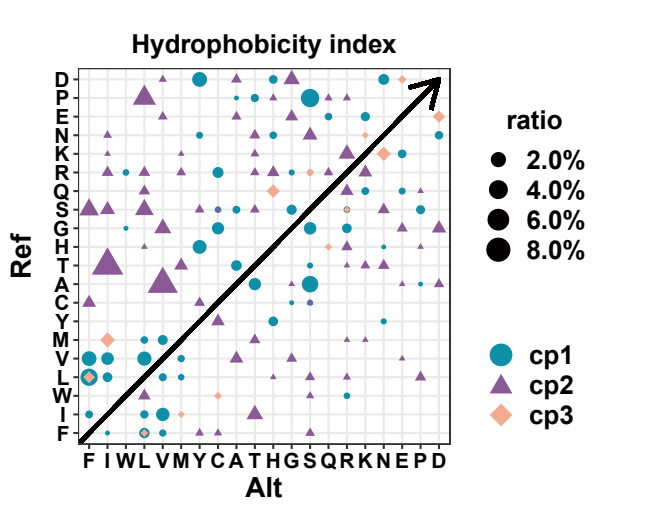

**A**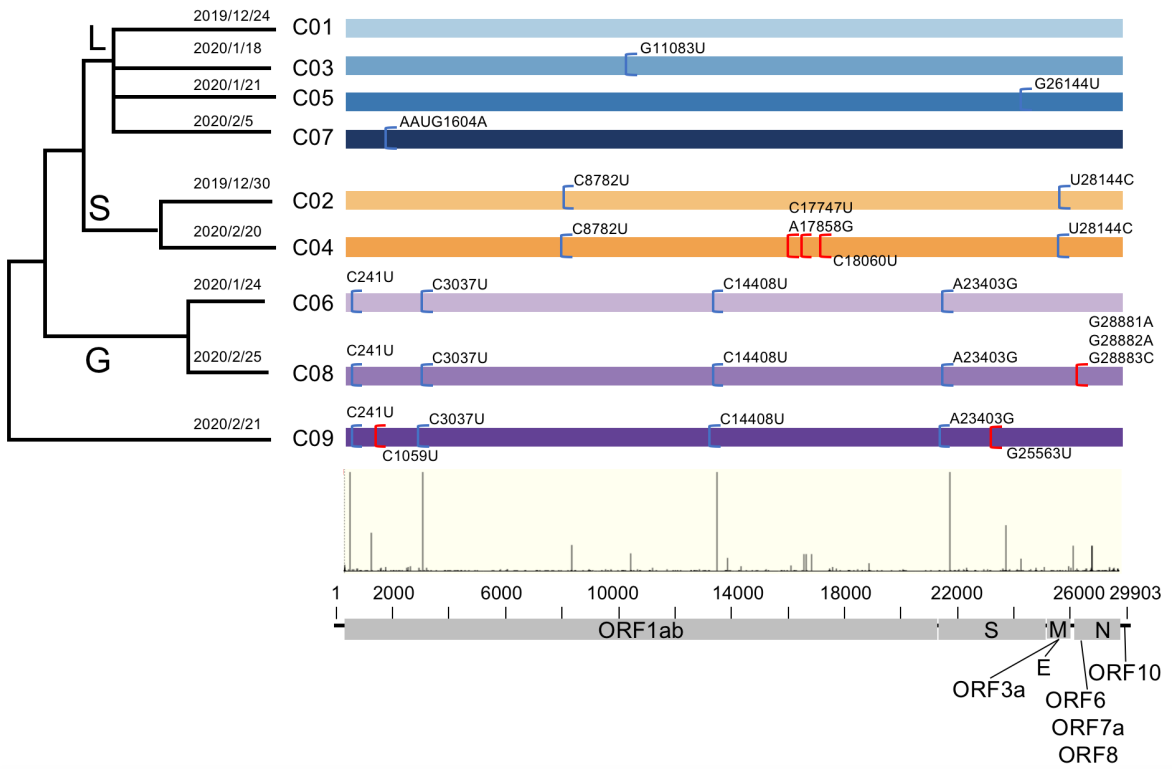**B**

Tree scale: 0.01

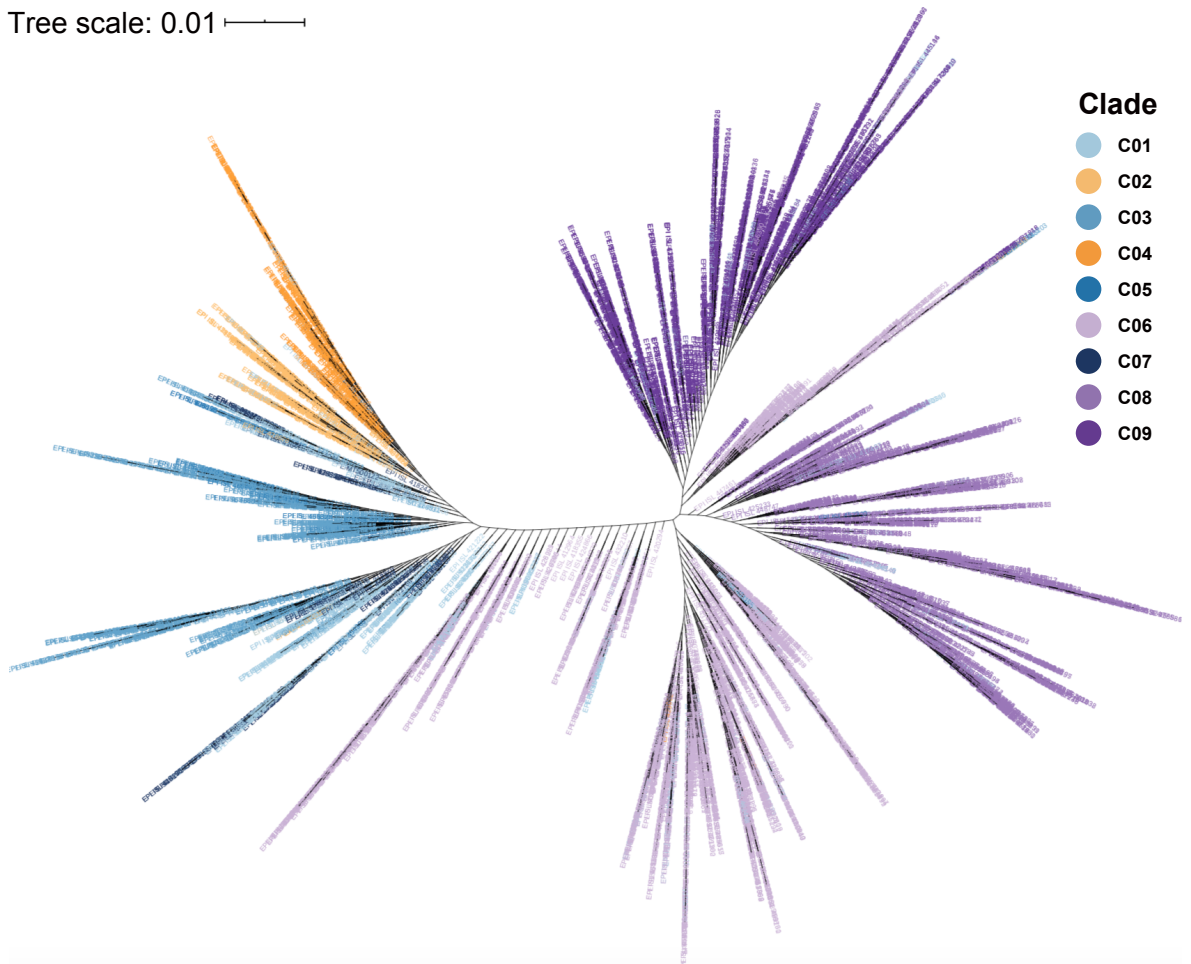

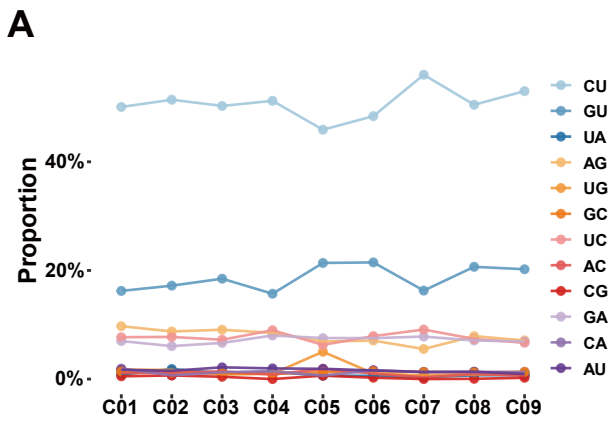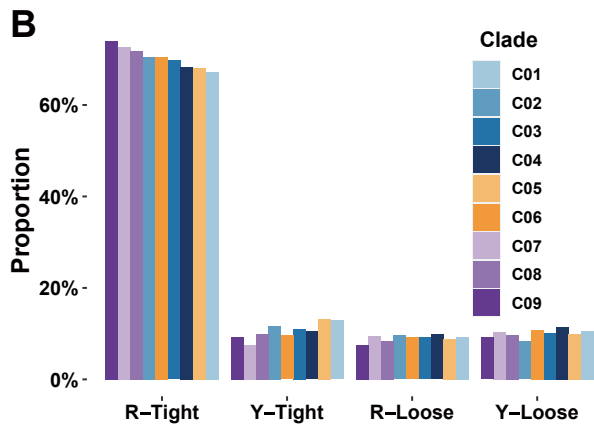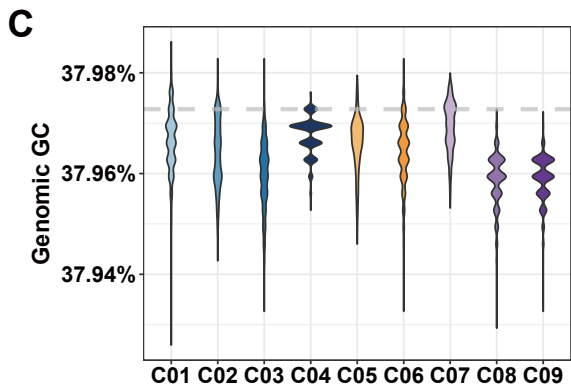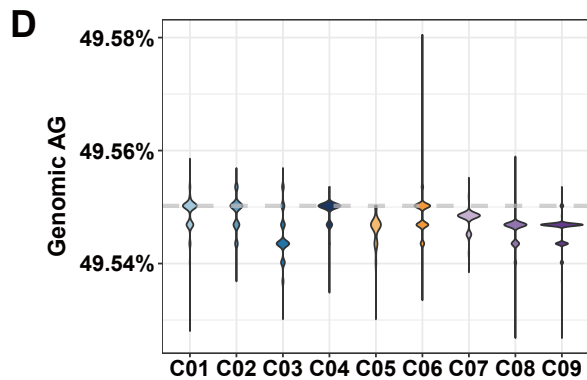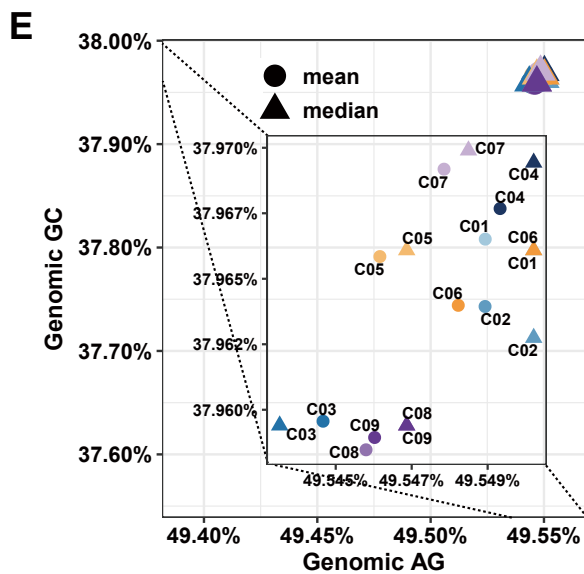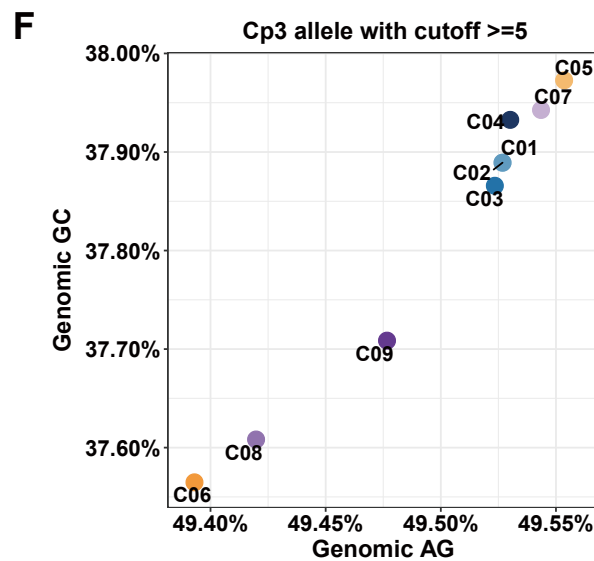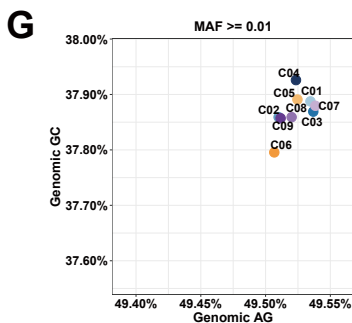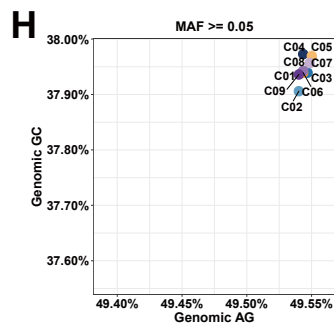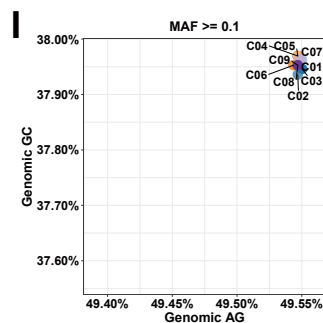



**A**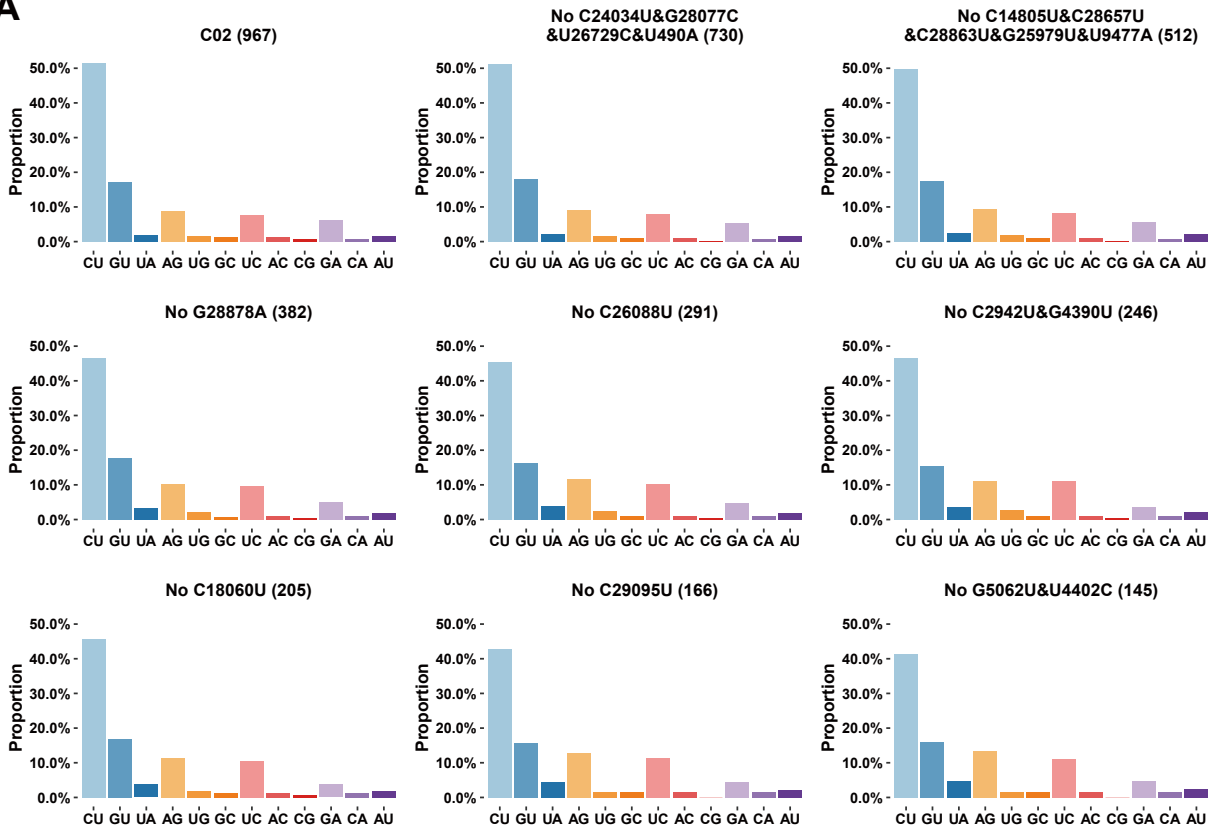**B**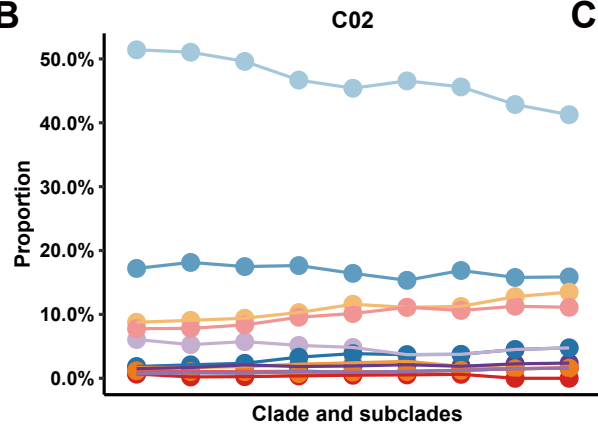**C**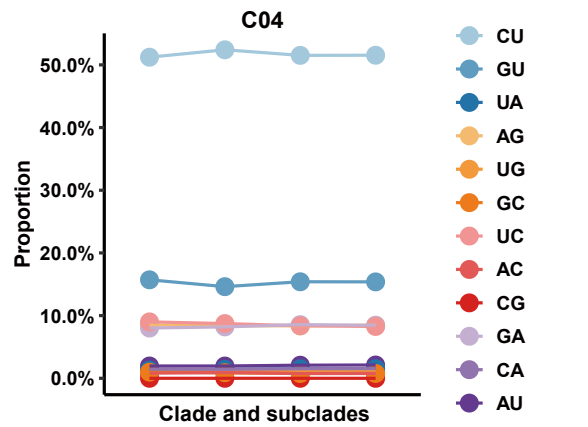**D**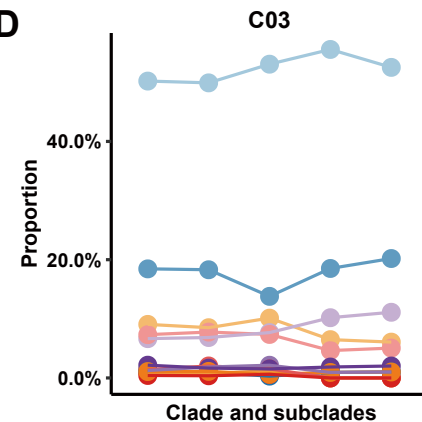**E**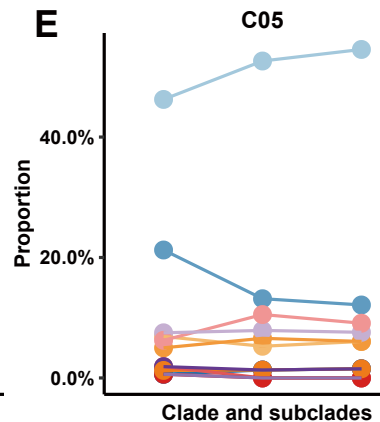**F**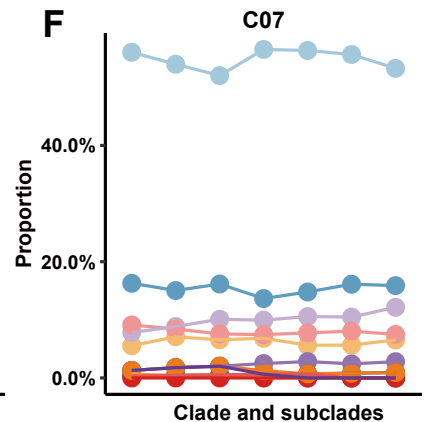

Source: https://www.biorxiv.org/content/10.1101/2020.08.26.267781v2.full.pdf
